# 1 *Saccharomyces* spores are born prepolarized to 2 outgrow away from spore-spore connections and 3 penetrate the ascus wall

4 **Running Title:** Upon germination budding yeast spores grow away from each other

5 Lydia R. Heasley<sup>1,2</sup>, Emily Singer<sup>1</sup> and Michael A. McMurray<sup>1</sup>

6 1 University of Colorado Anschutz Medical Campus, Cell and Developmental Biology  
7 (Aurora, CO, United States)

8 2 Colorado State University, Cell and Developmental Biology, Environmental Health and  
9 Radiological Sciences (Fort Collins, CO, United States)

10 **Keywords:** Saccharomyces; Septins; Life Cycle Stages; Cell Wall; Spores, Fungal

11 **Acknowledgements:** This work was supported by the National Science Foundation (award  
12 1928900 to M.M.) and by the National Institute of General Medical Sciences of the  
13 National Institutes of Health (award T32GM008730 to L.R.H., as part of the Molecular  
14 Biology PhD Program). The content is solely the responsibility of the authors and does not  
15 necessarily represent the official views of the National Science Foundation or the National  
16 Institutes of Health.

## 17 1. Abstract

18 How non-spore haploid *Saccharomyces* cells choose sites of budding and polarize towards  
19 pheromone signals in order to mate has been a subject of intense study. Unlike non-spore  
20 haploids, sibling spores produced via meiosis and sporulation by a diploid cell are  
21 physically interconnected and encased in a sac derived from the old cell wall of the diploid,  
22 called the ascus. Non-spore haploids bud adjacent to previous sites of budding, relying on  
23 stable cortical landmarks laid down during prior divisions, but since spore membranes are  
24 made de novo it was assumed that, as is known for fission yeast, *Saccharomyces* spores  
25 break symmetry and polarize at random locations. Here we show that this assumption is

26 incorrect: *Saccharomyces cerevisiae* spores are born prepolarized to outgrow, prior to  
27 budding or mating, away from interspore bridges. Consequently, when spores bud within  
28 an intact ascus, their buds locally penetrate the ascus wall, and when they mate, the  
29 resulting zygotes adopt a unique morphology reflective of re-polarization towards  
30 pheromone, which we dub the derrière. Long-lived cortical foci containing the septin Cdc10  
31 mark polarity sites, but the canonical bud site selection program is dispensable for spore  
32 polarity, thus the origin and molecular composition of these landmarks remain unknown.  
33 These findings demand further investigation of previously overlooked mechanisms of  
34 polarity establishment and local cell wall digestion, and highlight how a key step in the  
35 *Saccharomyces* life cycle has been historically neglected.

## 36 2. Introduction

37 Most steps in the *Saccharomyces cerevisiae* life cycle have been described in great detail at  
38 the cellular and molecular levels. For example, in the YeastBook series of reviews published  
39 by the journal *GENETICS*, forty three articles to date “span the breadth of *Saccharomyces*  
40 biology” (<https://www.genetics.org/content/yeastbook>). Here and in other sources can be  
41 found numerous mechanistic insights into the ways that budding yeast cells choose bud  
42 sites by positioning polarity factors according to mating-type-specific cortical landmarks;  
43 how a potent extrinsic signal, mating pheromone, can override these landmarks; and how  
44 cells use hydrolytic enzymes to remodel their cell walls upon budding and cell fusion. The  
45 unique morphology yeast cells adopt as they grow chemotropically toward a pheromone  
46 source even garnered an enduring and endearing name, the shmoo, based on its  
47 resemblance to a comic strip character from the mid 1900s. Indeed, early studies of the  
48 signal transduction cascades underlying the pheromone response and the ways that yeast

49 cells repolarize to track pheromone gradients were foundational in our general  
50 understanding of eukaryotic signal transduction and polarity determination.

51 Accordingly, we find it remarkable how little is known about a step of the *Saccharomyces*  
52 life cycle for which polarity, chemotropism, and cell wall remodeling are crucial.

53 Germination is the process by which spores awaken from a nearly dormant state, break out  
54 of a rigid, specialized cell wall, and grow in a single direction by producing new membrane  
55 and cell wall. Only a single review dedicated to germination has been published, over a  
56 decade ago (Geijer et al., 2010).

57 Since most natural isolates of *S. cerevisiae* are diploid, most spores are haploid, and  
58 germinating spores are capable of mating immediately (without a prior budding event) if a  
59 suitable mating partner is sufficiently close by (Joseph-Strauss et al., 2007). The  
60 assumption from the literature is that mating between spores follows the same rules as  
61 what has been worked out for non-spore haploids, but this has not been rigorously tested.

62 Alternatively, and often regardless of the proximity of a mating partner (McClure et al.,  
63 2018), following outgrowth haploid spores can enter S phase and bud from the tip of the  
64 outgrowth. The most recent comprehensive review of cell polarity in yeast states that "in  
65 yeasts, germinating spores lack obvious positional cues and appear to break symmetry to  
66 initiate polar growth" (Chiou et al., 2017). This statement is clearly true for the fission  
67 yeast *Schizosaccharomyces pombe*, where an elegant study demonstrated that polarity  
68 factors, including active Cdc42, wander randomly around the cortex of growing spores until  
69 the outer spore wall breaks, whereupon polarity is stabilized at the site of wall rupture  
70 (Bonazzi et al., 2014). In *S. cerevisiae*, on the other hand, a single polarity site is already  
71 apparent in dormant spores, prior to germination; the only known marker of this site is the  
72 septin protein Cdc10 (Joseph-Strauss et al., 2007). Polarization of the actin cytoskeleton, a

73 prerequisite for outgrowth, occurs only after germination begins (Kono et al., 2005). In  
74 non-spore cells, septins are recruited to the site of future budding by active Cdc42 and  
75 Cdc42-interacting proteins (Iwase et al., 2006); it is not known how Cdc10 is deposited  
76 during sporulation at a single site on each spore. During sporulation the spore cortex is  
77 synthesized de novo, precluding any influence on bud site selection by persistent cortical  
78 landmarks produced by previous budding events.

79 Yeast sporulation takes place within a single (usually diploid) cell and generates (usually  
80 four) spores encased within the original cell wall of the sporulating cell, called the ascus  
81 (Neiman, 2011). Whereas in *S. pombe* the ascus wall is globally digested by cell wall  
82 hydrolases immediately upon the successful completion of meiosis (Dekker et al., 2007;  
83 Encinar del Dedo et al., 2009; H. Guo & King, 2013), in *Saccharomyces* the ascus wall  
84 remains intact throughout sporulation. In the absence of external factors, such as those  
85 found in insect guts (A. E. Coluccio et al., 2008), the *Saccharomyces* ascus wall breaks  
86 down slowly during germination, often persisting long enough for spores to mate and bud  
87 following germination. *Saccharomyces* spores (but not spores of *S. pombe*) are also  
88 interconnected by cell wall junctions called interspore bridges that persist following ascus  
89 wall digestion (A. Coluccio & Neiman, 2004). Outgrowth by germinating spores first  
90 requires local break down of a rigid outer spore wall that confers stress resistance via layers  
91 of chitosan and polymerized dityrosine (in *Saccharomyces* (Briza et al., 1990)) or a  
92 proteinaceous coat (in *S. pombe* (Fukunishi et al., 2014)). Subsequent budding or mating  
93 requires local breakdown of the newly-emerged cell wall at the site of budding or fusion,  
94 respectively. If *Saccharomyces* spores bud when the ascus wall is still intact, those buds can  
95 locally penetrate the ascus wall, as visualized by electron microscopy many decades ago  
96 (Hashimoto et al., 1958; Rij, 1978; Sando et al., 1980). One of us (M.M.) noticed this  
97 phenomenon using light microscopy in the context of a more recent study, and verified that

98 the protrusions were buds by visualizing bud necks marked with fluorescently tagged septin  
99 proteins (McMurray & Thorner, 2008). The mechanisms by which germinating  
100 *Saccharomyces* spores digest cell walls during outgrowth, budding and mating have not  
101 been investigated.

102 Here we describe how the sites where spores bud and fuse upon mating, and the  
103 localization of Cdc10 with relation to the position of other haploid spores produced by the  
104 same diploid mother, demonstrate that each *S. cerevisiae* spore is born pre-polarized to  
105 direct outgrowth away from its “sibling” spores. Spore buds are thereby positioned to  
106 penetrate the ascus wall.

### 107 3. Materials and Methods

#### 108 3.1. Yeast strains and media

##### 109 Stable cortical foci of the septin Cdc10 at the ascus periphery

110 All strains used in the new experiments described here are of the S288C strain background,  
111 specifically derived from the “designer deletion” strains BY4741 (*MATa his3Δ1 leu2Δ0*  
112 *met15Δ0 ura3Δ0*), BY4742 (*MATα his3Δ1 leu2Δ0 lys2Δ0 ura3Δ0*), and BY4743 (the diploid  
113 formed by mating BY4741 and BY4742). Unless specified otherwise in the figure legend, all  
114 experiments were done with a diploid strain made by mating FY2742 (*MATα his3Δ1*  
115 *leu2Δ0 lys2Δ0 ura3Δ0 TAO1 MKT1 RME1*) and FY2839 (*MATa his3Δ1 leu2Δ0 lys2Δ0*  
116 *ura3Δ0 TAO1 MKT1 RME1*), two haploid strains that carry at three loci (*TAO1*, *MKT1*, and  
117 *RME1*) dominant alleles from the efficiently-sporulating SK-1 strain background  
118 (Kloimwieder & Winston, 2011). JTY3985 carries *CDC10-GFP* integrated at the *CDC10*  
119 locus using the *URA3* selectable marker and is otherwise isogenic to BY4741 (Johnson et  
120 al., 2015). MMY0341 (*gas1Δ::kanMX/gas1Δ::kanMX*) MMY0286 (*acf2Δ::kanMX*,

121 *acf2Δ::kanMX*), MMY0291 (*rsr1Δ::kanMX*, *rsr1Δ::kanMX*) were retrieved from the  
122 homozygous diploid deletion collection derived from BY4743 (Giaever et al., 2002).  
123 Previously published Gas1-GFP localization data reproduced here used a diploid strain of  
124 the SK-1 background in which both genomic copies of *GAS1* were deleted and Gas1-GFP  
125 was expressed from a high-copy plasmid (Rolli et al., 2011).  
126 Haploid strains were mated together using sterile toothpicks by mixing approximately equal  
127 amounts on the surface of YPD agar (per liter: 10 g yeast extract, 20 g peptone, 20 g  
128 dextrose, 2% agar) in a petri dish. After overnight incubation at 30°C, cells from the  
129 mixture were streaked with a toothpick to agar media that was either selective for the  
130 diploid, or non-selective (YPD). In the latter case, diploid clones were identified as  
131 individual colonies containing cells that were able to sporulate.  
132 To induce sporulation, diploid cells were cultured in 5 mL liquid YPD (per liter: 10 g yeast  
133 extract, 20 g peptone, 20 g dextrose) in glass culture tubes rotated in a roller drum  
134 overnight to near-saturation. For analysis of *rsr1Δ/rsr1Δ* cells in “old” rich medium, the  
135 culture time in YPD was extended for 6 additional days. A 200- $\mu$ L aliquot of these cells was  
136 washed with 5 mL sterile water and resuspended in 2.5 mL sporulation medium (1%  
137 potassium acetate, 0.05% glucose, 20 mg/L leucine, 40 mg/L uracil) in a new tube to an  
138 optical density at 600 nm of approximately 0.5. These cell suspensions were rotated at  
139 22°C for at least 4 days, after which time the percentage of cells that had formed mature  
140 asci did not noticeably increase. To induce germination, aliquots of cells from sporulation  
141 cultures were pelleted and resuspended in 1 mL YPD in 1.7-mL microcentrifuge tubes and  
142 rotated at 22°C or 30°C for 4-6 hours (or as indicated in figure legends). To digest the  
143 ascus wall, a 50- $\mu$ L aliquot of cells from sporulation culture was pelleted and resuspended

144 in 1 mg/mL Zymolyase-20T (#320921, MP Biomedicals) dissolved in water and incubated  
145 at 30 °C for 10 minutes.

146

### 147 3.2. Fluorescence labeling

148 FM™ 4-64 dye (N-(3-Triethylammoniumpropyl)-4-(6-(4-(Diethylamino) Phenyl)  
149 Hexatrienyl) Pyridinium Dibromide, from Molecular Probes, Inc. # T3166) was dissolved in  
150 dimethyl sulfoxide to make a 1.6 μM stock solution. An aliquot of cells from a sporulation  
151 culture that had been in sporulation medium for 18 hours was pelleted and resuspended in  
152 50 μL ice-cold YPD to which 1 μL of the dye stock was then added. After 20 minutes on ice  
153 in the dark, the cells were pelleted again and washed twice by resuspension in 1 mL ice-  
154 cold water each time. Finally, the cells were suspended in 50 μL water and visualized by  
155 microscopy using the Texas red LED filter cube.

156 Calcofluor white M2R was dissolved in water at a concentration of 10 mg/mL. 1 μL was  
157 added to a 100-μL aliquot of cells that had been in sporulation medium for 4 days, after  
158 which the cells were washed three times with water by pelleting and resuspension. After  
159 the third wash, the cells were resuspended in 1 mL YPD and incubated at 30 °C for 6 hours,  
160 then pelleted and resuspended in 50 μL before imaging.

### 161 3.3. Microscopy and imaging

162 Aliquots of cells from sporulation cultures were imaged directly on agarose pads made with  
163 1% agarose in water or, in the case of cells expressing Cdc10-GFP, before and after a 3.5-  
164 hour interval of incubation at 30 °C on an agarose pad made with 1% agarose in  
165 sporulation medium. Germinating cells were pelleted and resuspended in water before  
166 applying to agarose pads. All images were captured on an EVOSfl all-in-one microscope

167 (ThermoFisher Scientific, Waltham, MA) with an Olympus 60× Plan-Apo oil objective  
168 (numeric aperture 1.42). Filter cubes were as follows: GFP (AMEP4651, excitation 470/22  
169 nm, emission 510/42 nm), Texas red (AMEP4655, excitation 585 nm, emission 624 nm),  
170 RFP (AMEP4652, excitation 531/40 nm, emission 593/40 nm), and DAPI (AMEP4650,  
171 excitation 357/44 nm, emission 447/60 nm). Images were cropped and adjusted (always  
172 the same way for each image of the same type from the same experiment), and inverted in  
173 Photoshop (Adobe, San Jose, CA).

## 174 4. Results

### 175 4.1. Stable cortical foci of the septin Cdc10 at the ascus periphery

176 That single *S. cerevisiae* spores are born pre-polarized was known from the discrete  
177 localization of the septin Cdc10 to a single site on the spore cortex from which cell wall  
178 outgrowth occurs (Joseph-Strauss et al., 2007). However, it was not known how the site of  
179 spore pre-polarization relates to the spatial relationship between the spores, the interspore  
180 bridges, and the ascus wall. If spore buds commonly penetrate the ascus wall, then spores  
181 should be polarized to outgrow and bud away from the interspore bridges at the center of  
182 the ascus. To test this prediction, we visualized Cdc10-GFP in spores within intact, mature  
183 asci. As is true of diverse fluorescently-tagged proteins, strong signal was observed in the  
184 areas between the spores (Figure 1A), presumably reflecting Cdc10-GFP molecules that  
185 were outside the prospore membranes as they closed and thus remained in the ascus  
186 cytoplasm, which becomes concentrated between the spores as the ascus wall compresses  
187 tightly to surround the spores during the final stages of ascus maturation. Cdc10-GFP signal  
188 is not found at these locations in spores that are isolated from asci (Joseph-Strauss et al.,  
189 2007). Apart from this signal, single Cdc10-GFP puncta were found in many (but not all)  
190 spores (Figure 1A); the failure to observe a punctum in every spore may reflect the fact that



191 only one allele of *CDC10* in the diploid strain expresses the GFP fusion. While it is known  
192 that all spores from such *CDC10-GFP/CDC10* heterozygous diploids inherit some pre-  
193 existing Cdc10-GFP protein, regardless of their haploid genotype, those that fail to inherit  
194 the *CDC10-GFP* allele have fainter signal (Joseph-Strauss et al., 2007). When they were  
195 visible, Cdc10-GFP puncta were found in locations consistent with a mode of outgrowth  
196 upon germination that precedes spore budding through an intact ascus wall (Figure 1A and  
197 data not shown).

198 Spores can survive for long periods in nutrient-free conditions and then, once nutrients are  
199 provided, germinate efficiently. We see no obvious effect on the site of budding during  
200 germination of the length of time between sporulation and germination (unpublished  
201 observation); indeed, the images in Figure 1A were taken of asci that had been in  
202 sporulation medium for over 7 days, with the vast majority of asci in these cultures having  
203 visibly completed maturation by day 4. If Cdc10 foci mark the location of spore pre-  
204 polarization, then these cortical foci must not diffuse to any great extent over time.  
205 Alternatively, they may be able to diffuse on regions of the cortex far from the interspore  
206 bridges, but may be prevented from diffusing into the cortical areas near interspore bridges.  
207 To distinguish between these possibilities, we visualized Cdc10-GFP foci before and after an  
208 interval of 3.5 hrs. We could detect no change in location during this time (Figure 1B).  
209 These data suggest that diffusion of the cortical Cdc10-GFP foci is highly restricted,  
210 potentially allowing spores to maintain cortical polarity for long periods of time.

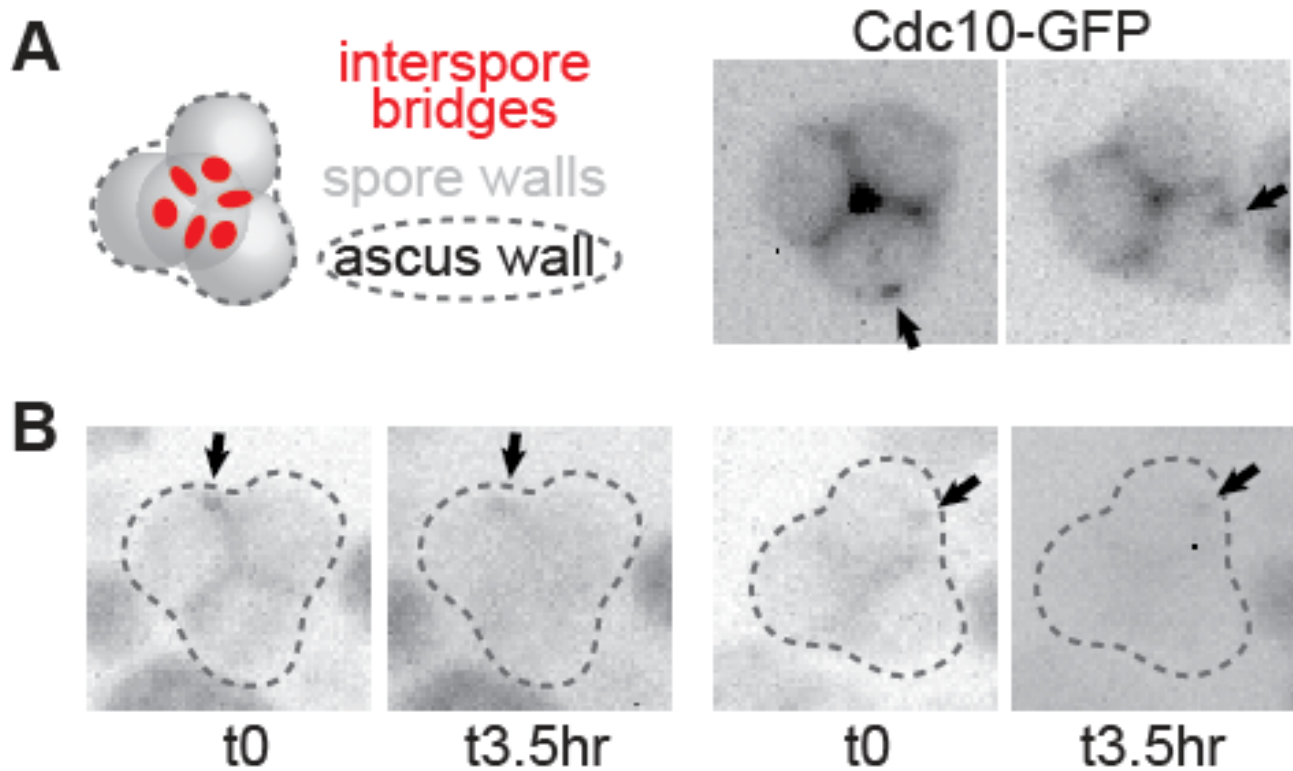

211

212 **Figure 1. Stable cortical foci of the septin Cdc10 persist on the periphery of asci.** (A) At left  
213 is an illustration of a typical pyramidal four-spored ascus in which the three spores at the  
214 “base” of the pyramid are in the same focal plane. Red circles indicate interspore bridges.  
215 At right, Cdc10-GFP fluorescence in intact asci from sporulation culture. Arrows indicate  
216 cortical foci. (B) As in (A), but the same asci were visualized before and after a 3.5-hr  
217 interval on solid sporulation medium. Cells are of diploid strain made by mating haploid  
218 strains JTY3985 and FY2742.

219 4.2. Ascus wall penetration upon spore budding points to prepolarization of  
220 spores away from interspore bridges

221 If spores are pre-polarized to outgrow upon germination towards the periphery of the  
222 ascus, then when germinating spores bud while they are still within the ascus, they should  
223 locally penetrate the ascus wall, such that the buds protrude from the ascus surface. If,  
224 instead, spore pre-polarization is random, then spore budding should frequently result in  
225 budding in between the spores, within the ascus, without penetrating the ascus wall. We

226 exploited the weak red autofluorescence of the post-germination spore wall (Joseph-Strauss  
227 et al., 2007) to identify trapped buds (non-fluorescent cell wall outgrowth) within the  
228 crowded environment of an intact ascus full of germinating spores. Among hundreds of  
229 such asci we have only seen a single likely case of a bud "trapped" within the ascus (Figure  
230 2A).

231 As an independent way to visualize bud penetration of the ascus wall, we performed a  
232 pulse-chase with calcofluor white, which fluorescently labels cell wall chitin (Cabib &  
233 Bowers, 1975). The ascus wall in mature asci was labeled with calcofluor, and then excess  
234 dye was washed away prior to the induction of germination by addition of rich (YPD)  
235 medium (Figure 2B). New cell wall synthesized in the absence of calcofluor white is non-  
236 fluorescent. Spore buds emerged from holes in the ascus wall, which otherwise remained  
237 intact (Figure 2B). Thus budding by germinating spores is directed away from the  
238 interspore bridges that connect spores to each other, and towards the ascus wall that  
239 surrounds them. Budding away from interspore bridges was also apparent for  
240 interconnected spores in which the ascus wall was enzymatically removed (Figure 2C).

241

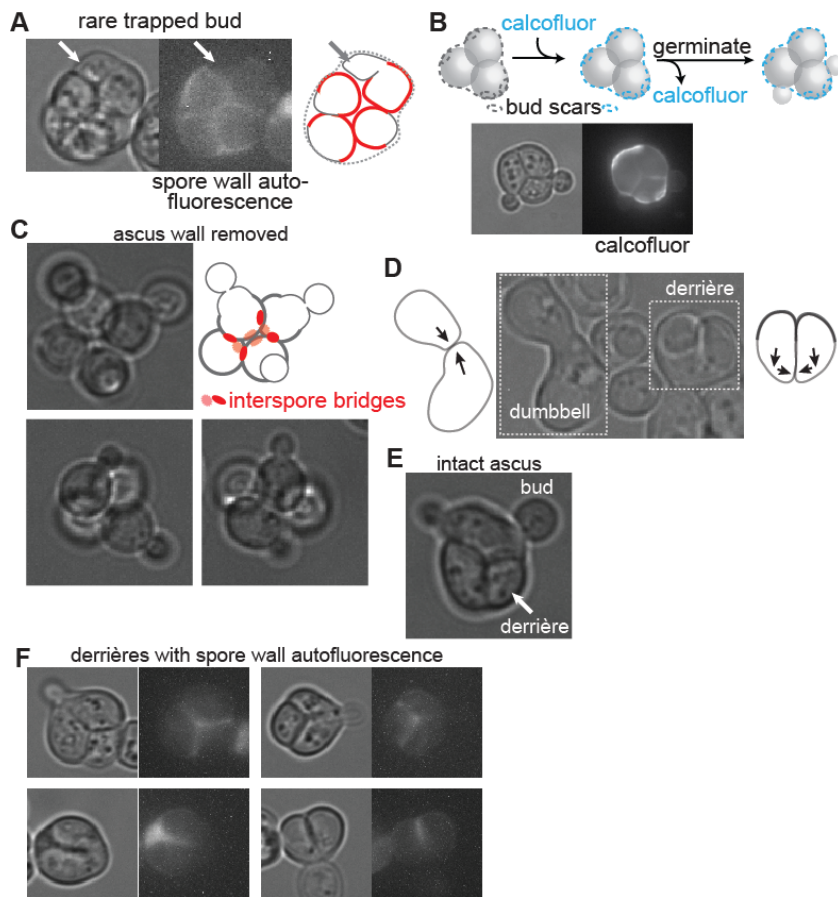

242

243 **Figure 2 *Saccharomyces* spores outgrow away from interspore bridges upon germination.**

244 (A) Germinating ascus as viewed by transmitted light and with autofluorescence of the  
245 spore wall visualized with an RFP filter. (B) According to the illustration, asci were exposed  
246 to the chitin-binding dye calcofluor white and then, after washing away free dye, allowed  
247 to germinate. Pre-existing bud scars on the ascus wall were deposited during diploid  
248 budding events prior to sporulation. Calcofluor fluorescence and transmitted light are  
249 shown. (C) Tetrads for which the ascus wall was removed by exposure to Zymolyase prior  
250 to germination. In the illustration red circles are interspore bridges, and the spore wall is  
251 thicker than the new, vegetative cell wall. (D) Image taken several hours after asci were  
252 allowed to germinate, showing dumbbell-shaped zygote and derrière-shaped zygote, with  
253 illustrations of presumptive directions of outgrowth prior to fusion. (E) Germinating ascus  
254 showing two buds penetrating the ascus wall and the other two spores fused into a

255 derrière. (F) As in (A), after 7.75 hours of germination, showing localization of the  
256 autofluorescent spore wall with regard to the shape of the derrière.

### 257 4.3. Unique zygote morphology provides independent evidence of spore 258 prepolarization

259 We noticed independent evidence of spore pre-polarization in the morphology of zygotes  
260 produced by spores that mated within the ascus. Figure 2D shows an image of cells from a  
261 population of germinating asci in which a zygote formed by non-spore haploid cells (or  
262 possibly a spore with a non-spore cell) is adjacent to a zygote formed by mating between  
263 sibling spores. The dumbbell morphology of the zygote formed by non-spore mating is  
264 consistent with the morphology established in the literature for mating between wild-type  
265 haploids (Sena et al., 1973), where prior to cell fusion each partner grows directly towards  
266 the other, following a pheromone gradient. The zygote formed from intra-ascus mating  
267 between spores is distinctly different, as if both mating partners initially grew in  
268 approximately the same direction, roughly perpendicular to a line directly connecting them,  
269 and then redirected growth towards each other prior to fusion (Figure 2D). Similar to the  
270 use of the term "shmoo" to refer to the unique morphology adopted by non-spore cells just  
271 prior to mating, we sought a new term to refer to the unique morphology of zygotes  
272 produced by mating between sibling spores. Inspired by the inescapable resemblance of one  
273 side of the resulting shape to the shape of the human buttocks, we propose the term  
274 "derrière". Derrières were also seen within intact asci after germination (Figure 2E).

275 The rigid outer spore wall is likely a barrier to outgrowth, which requires cell wall  
276 breakdown at the site of fusion. Cell wall expansion upon germination is thus restricted to  
277 the site of outer spore wall breakdown, and the residual spore wall changes little upon  
278 germination and thereafter. If spores break down the outer spore wall at sites

279 approximately opposite from the interspore bridges, then two adjacent spores within an  
280 ascus should grow along vectors that do not converge and instead are parallel or, more  
281 likely, divergent (Figure 2D). If redirected growth towards a pheromone source is only  
282 possible for vegetative cell wall, where polarized exocytosis targets cell wall synthesis  
283 enzymes to specific sites, then some amount of cell wall outgrowth is presumably required  
284 before that cell wall outgrowth can be redirected towards the pheromone source. This  
285 model predicts derrière-shaped zygotes with spore wall in the twin bulges. To test this  
286 model, we visualized spore wall autofluorescence within derrières. As expected, spore wall  
287 fluorescence was restricted to the twin bulges of derrières (Figure 2F). Buds then emerged  
288 from the site of fusion (Figure 2D,F).

#### 289 4.4. The old plasma membrane of the sporulating diploid cell disappears prior 290 to germination

291 In addition to local digestion via budding, the ascus wall breaks down globally during  
292 germination, albeit on a slower time scale. In *S. pombe*, two hydrolytic enzymes, the  $\alpha$ -1,3-  
293 glucanase Agn2 and the endo- $\beta$ -1,3-glucanase Eng2, reside in the ascus cytoplasm because  
294 they lack signal sequences to drive secretion (Dekker et al., 2007; Encinar del Dedo et al.,  
295 2009). It has been speculated that after completion of spore wall synthesis, the old plasma  
296 membrane of the diploid fission yeast cell “may disintegrate through an unknown  
297 mechanism” (Dekker et al., 2007) allowing the two enzymes access to their substrates.

298 If in *Saccharomyces* spore buds frequently penetrate the ascus wall, we wondered if in  
299 doing so they also penetrate the old plasma membrane of the sporulating cell, or if, as is  
300 thought for fission yeast, that membrane has already been destroyed. Late in sporulation,  
301 vacuole lysis releases hydrolytic enzymes that destroy, among other things, nuclei that were  
302 not protected by prospore membrane engulfment (Eastwood et al., 2012). The functional

303 integrity of old plasma membrane becomes compromised at the same time, suggesting that  
304 this membrane may also be destroyed by vacuole lysis (Eastwood & Meneghini, 2015). A  
305 direct examination of plasma membrane persistence during sporulation has not, to our  
306 knowledge, been reported. To label the plasma membrane in cells undergoing sporulation,  
307 we exposed an asynchronously sporulating culture to FM4-64, a lipophilic dye (Vida & Emr,  
308 1995). As can be seen in Figure 3, very early in sporulation, when spore walls had not yet  
309 been made, only the plasma membrane was labeled. Slightly later, when spore walls had  
310 been made but the ascus wall had not yet compressed around the spores, the old plasma  
311 membrane was labeled and, in some cases, the spore membranes were also labeled. In  
312 mature asci, in which the ascus wall had compressed tightly around the spores, only spore  
313 membrane labeling was visible. We interpret these results as an intact plasma membrane  
314 "shielding" the spore membranes from labeling early in sporulation, then losing structural  
315 integrity later in sporulation, and finally disappearing altogether in mature asci. If our  
316 interpretation is correct, when spores germinate and bud within an intact ascus, they only  
317 penetrate an old cell wall, and not an old membrane, in order to exit the ascus.

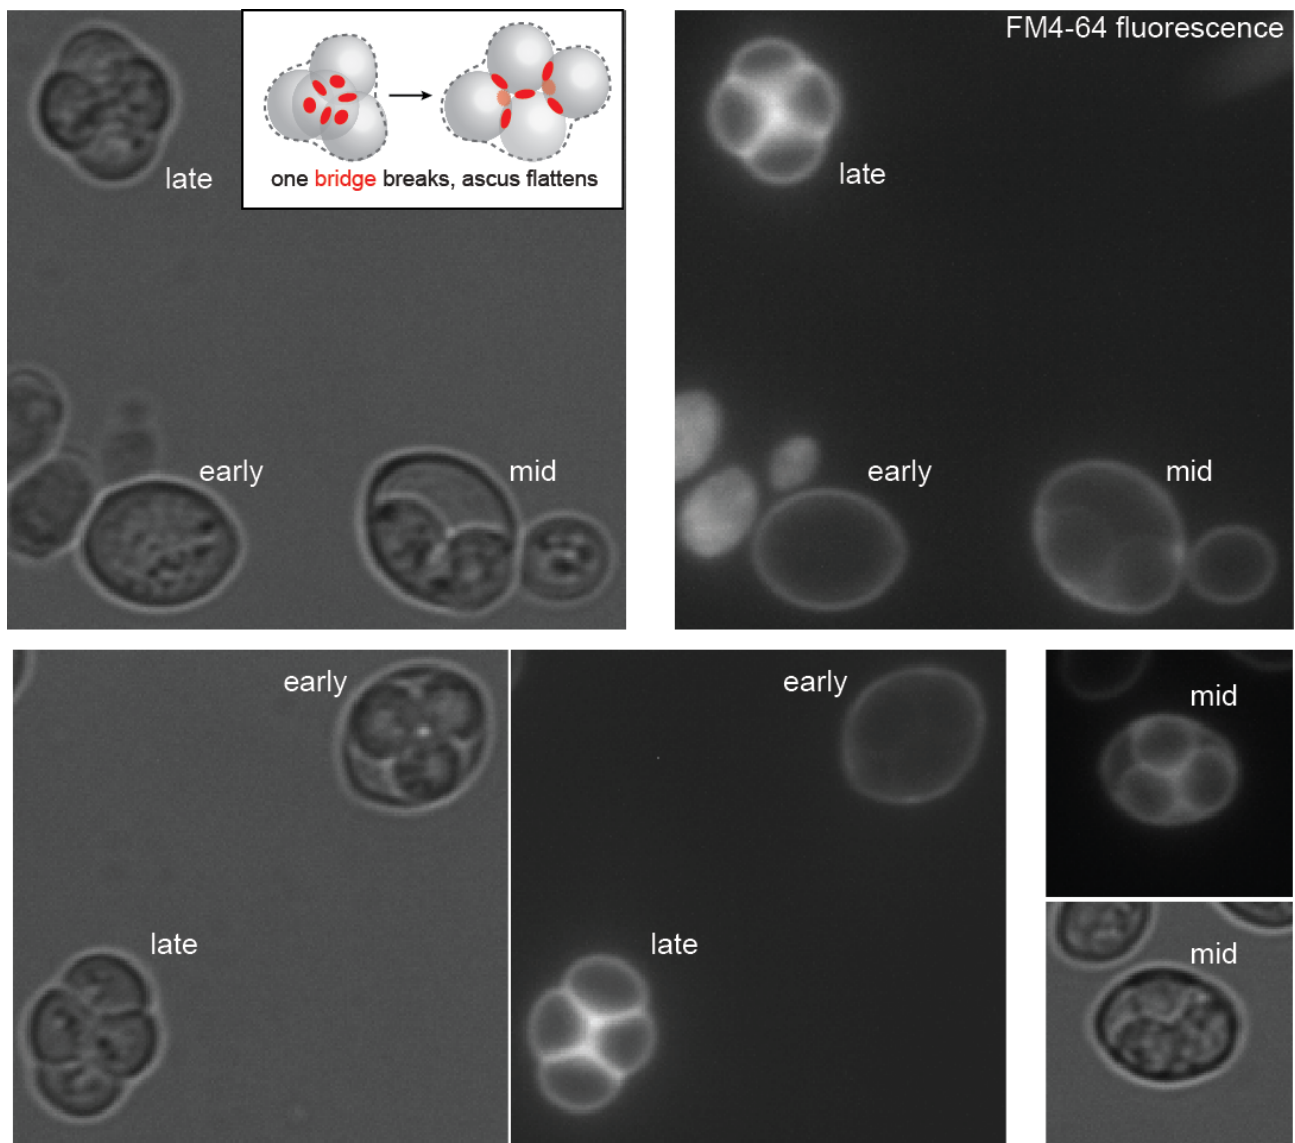

318

319 **Figure 1 Gradual loss of the old plasma membrane during sporulation.** An asynchronously

320 sporulating culture was exposed briefly to the lipophilic dye FM™ 4-64. The stage of

321 sporulation is labeled and was estimated based on spore and ascus wall appearance by

322 transmitted light. Inset, an illustration of the arrangement of spores in a tetrahedral ascus

323 with all six interspore bridges (red circles) intact, and in a rhomboid ascus in which one of

324 the bridges has broken (dashed red circle) as an ascus flattens under a coverslip.



## 325 4.6. Global ascus wall digestion does not require the putative cell wall

### 326 hydrolase Acf2

327 In the *S. cerevisiae* genome, the *ACF2* gene (alias *ENG2*) encodes a homolog of *S. pombe*  
328 Eng2, one of the enzymes responsible for global ascus wall digestion (Encinar del Dedo et  
329 al., 2009). Like Eng2, Acf2 lacks a predicted signal sequence. In *S. pombe*, the absence of  
330 either Agn2 or Eng2 is sufficient to almost completely prevent global ascus wall digestion,  
331 resulting in mature spores trapped within an ascus wall (Dekker et al., 2007; Encinar del  
332 Dedo et al., 2009). If in *S. cerevisiae* Acf2 digests the ascus wall during germination, we  
333 predicted that it should either be translated near the end of sporulation and then secreted  
334 into the ascus cytoplasm upon germination, or both translated and secreted immediately  
335 upon germination. No translation data are available for germination, but existing ribosome  
336 profiling data from synchronously sporulating cells (Brar et al., 2012) demonstrate that  
337 Acf2 translation spikes at the last stage of sporulation, just before mature spores are  
338 produced (Figure 4A). If gradual Acf2-mediated digestion gradually thins the ascus wall  
339 during germination, we predicted that in asci lacking Acf2, the ascus wall might remain too  
340 thick and inhibit penetration by spore buds. However, we saw no discernible difference in  
341 the frequency or morphology of instances in which the buds of *acf2Δ* spores penetrated the  
342 ascus wall upon germination (Figure 4B). In *S. cerevisiae*, either Acf2 performs a different  
343 function than Eng2, or loss of a single digestive enzyme is not enough to toughen the ascus  
344 wall to an extent that is impenetrable by buds.

## 345 4.5. Local ascus wall digestion does not require the putative cell wall

### 346 hydrolase Gas1

347 To identify candidate enzymes that may mediate local digestion of the ascus wall during  
348 germination, we searched the literature for published localization patterns of cell wall

349 hydrolytic enzymes, with the logic that a protein responsible for local wall digestion should  
350 localize at the site of digestion. Translation of the  $\beta$ -1,3-glucanosyltransferase Gas1  
351 translation increases at the end of sporulation (Figure 4A), and while this pattern was not  
352 specifically noted by the authors, examination of a GFP-tagged allele of Gas1 in spores  
353 germinating within an intact ascus revealed that Gas1-GFP clearly localizes to a broad  
354 region of the spore cortex opposite from interspore bridges (Rolli et al., 2011) (Figure 4C).  
355 To ask if Gas1 is required for the ability of buds to penetrate the ascus wall, we monitored  
356 germination by *gas1 $\Delta$ /gas1 $\Delta$*  mutant diploid cells. Consistent with the phenotype reported  
357 in the literature for non-spore haploid *gas1 $\Delta$*  cells (Watanabe et al., 2009), the buds  
358 produced by *gas1 $\Delta$*  spores were oddly-shaped, but they had no problems penetrating the  
359 ascus wall (Figure 4D). Thus deletion of *GAS1* is insufficient to prevent local ascus wall  
360 digestion by germinating spores.

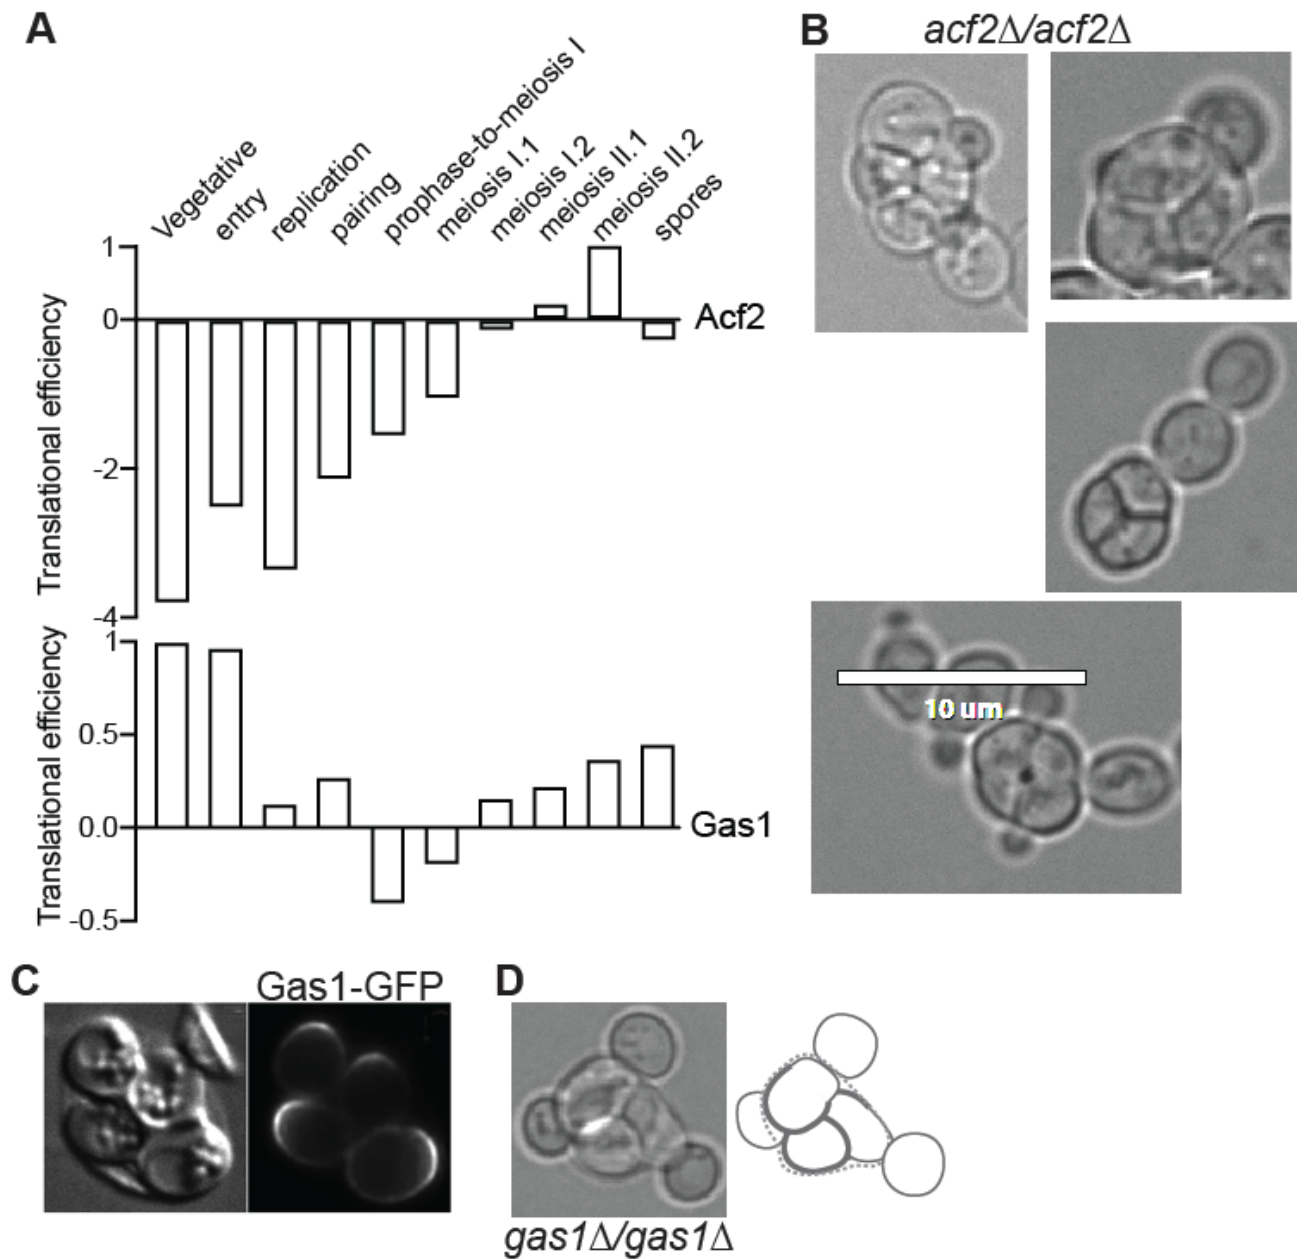

361

362 **Figure 2 Penetration of the ascus wall by spore budding does not require Gas1 or Acf2.** (A)

363 Translational efficiencies (a measure of ribosome occupancy per mRNA) for Acf2 and Gas1

364 at various timepoints during sporulation. Data are from (Brar et al., 2012). (B)

365 Germinating asci of *acf2Δ/acf2Δ* strain MMY0286 showing penetration of the ascus wall by

366 spore budding. Scale bar, 10  $\mu$ m. (C) Localization of Gas1-GFP to sites of spore outgrowth

367 upon germination. Reproduced from (Rolli et al., 2011). (D) A germinating ascus of

368 *gas1Δ/gas1Δ* strain MMY0341.

#### 369 4.6. The canonical bud site selection pathway does not drive polarity in 370 spores

371 Spores polarize approximately opposite from the cluster of interspore bridges that connect  
372 them to the other spores within in ascus. Similarly, diploid non-spore cells usually polarize  
373 opposite from the previous bud site (Chiou et al., 2017). We noticed that two genes  
374 required for bipolar bud site selection by non-spore cells, *RSR1* (Bender & Pringle, 1989)  
375 and *SPH1* (Roemer et al., 1998), are transcriptionally induced early in germination  
376 (Joseph-Strauss et al., 2007). We wondered if the same pathway that controls bipolar  
377 budding in non-spore diploids also controls spore polarization. We sporulated *rsr1Δ/rsr1Δ*  
378 diploids and monitored budding upon germination.

379 Analysis of budding was complicated by the fact that many of the mutant cells had multiple  
380 buds even prior to germination (Figure 5A). Unlike mitotic DNA replication, premeiotic  
381 DNA replication is usually uncoupled from bud emergence. The few singly-budded asci  
382 found in nominally wild-type strain backgrounds presumably arise from diploid cells that  
383 were in a small window of early S phase when sporulation began and proceeded directly  
384 into meiosis upon completion of DNA replication (Croes et al., 1976). In the *rsr1Δ/rsr1Δ*  
385 mutants, however, either buds formed during multiple prior cell cycles failed to separate  
386 from the mother, or multiple buds formed simultaneously upon premeiotic S phase entry.  
387 We favor the latter interpretation, considering that simultaneous multiple budding is a  
388 known phenotype of *rsr1Δ* haploid cells expressing a synthetic fusion of the polarity  
389 scaffold protein Bem1 to the v-SNARE Snc2, and that this phenotype is exacerbated when  
390 cells are cultured in minimal, as opposed to rich, medium (Howell et al., 2009). The  
391 starvation conditions induced by sporulation medium may bypass the need for the Bem1-  
392 Snc2 fusion in driving multiple budding events. Indeed, we found that starving *rsr1Δ/rsr1Δ*

393 diploid cells by prolonged culture (1 week) in rich medium, which does not induce  
394 sporulation, was sufficient to induce a bi-budded phenotype (Figure 5B).

395 To unambiguously identify buds produced during germination, we applied the calcofluor  
396 pulse-chase method. The vast majority of *rsr1Δ/rsr1Δ* asci that were not budded prior to  
397 germination showed buds penetrating the ascus upon germination (Figure 5C and data not  
398 shown). We conclude from these results that spore polarity is not determined by the  
399 canonical pathway that drives polarity during budding by non-spore cells.

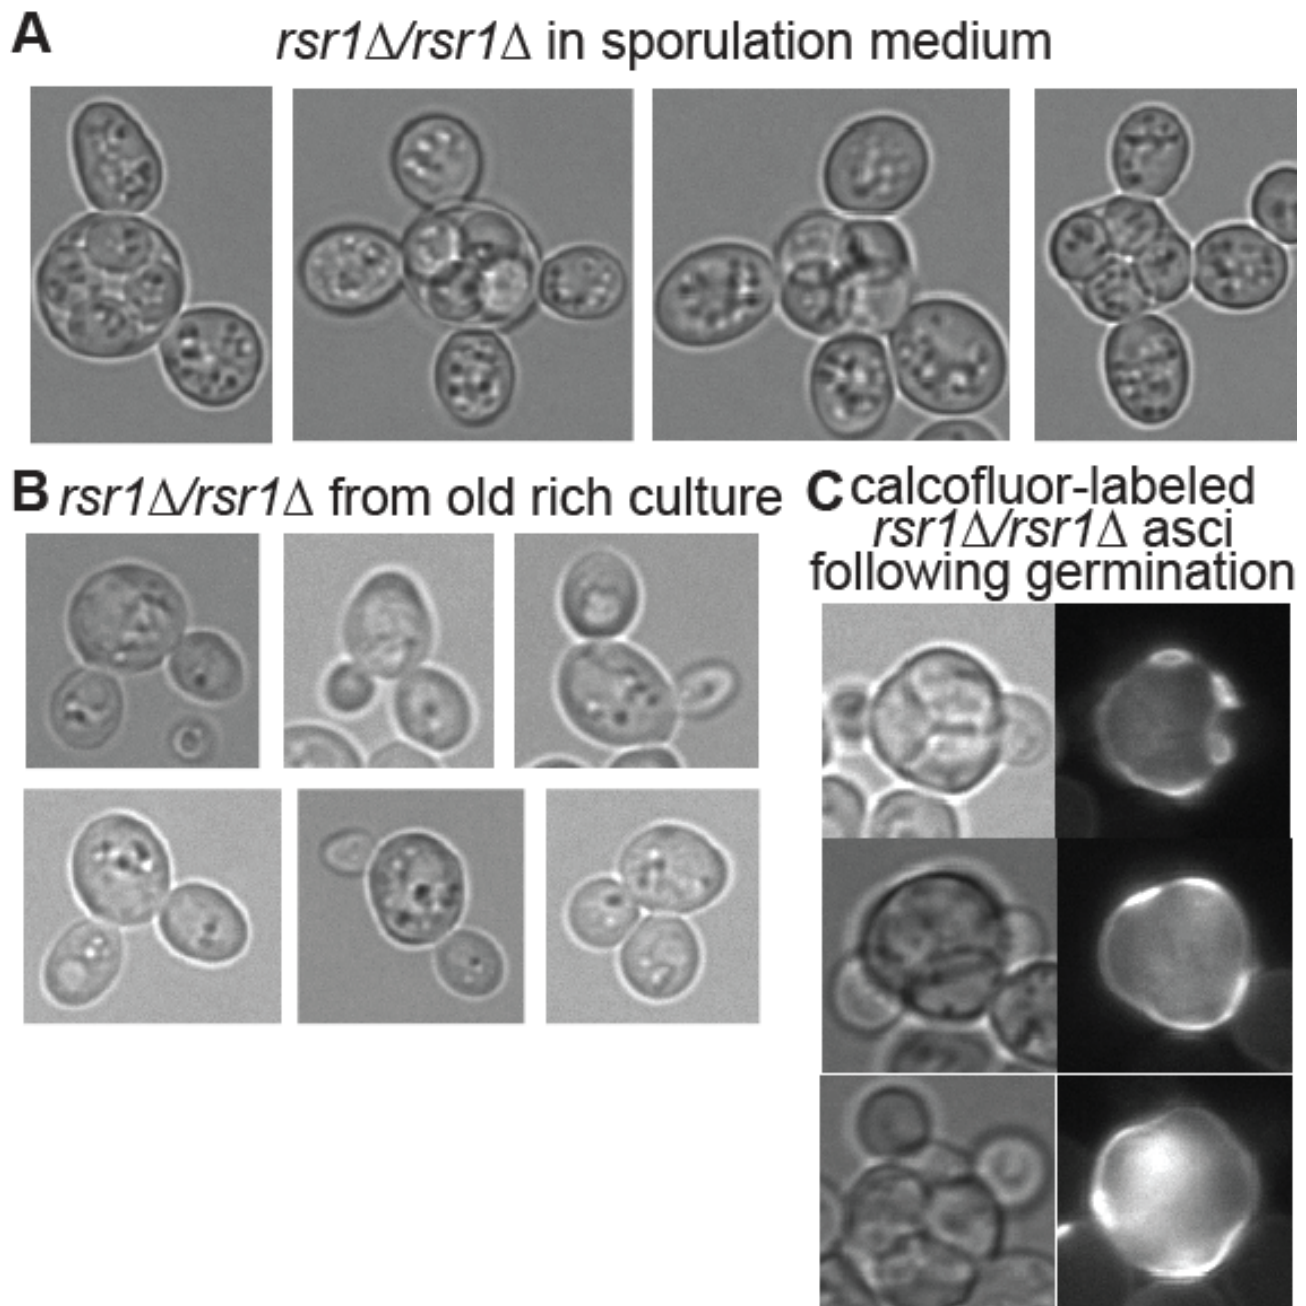

400

401 **Figure 3 Cells lacking the polarity factor Rsr1 form multiple buds upon starvation but spore**

402 **buds are able to penetrate the ascus wall.** *rsr1* $\Delta$ /*rsr1* $\Delta$  strain MMY0291 was cultured in (A)

403 sporulation medium, (B) rich medium for 1 week, or (C) sporulation medium, followed by

404 pulse labeling with calcofluor white, and then rich medium to induce germination.

405

Fluorescence images show calcofluor fluorescence.

## 406 5. Discussion

407 The evidence for prepolarization of *S. cerevisiae* spores has been hiding in plain sight for  
408 decades. For every published image we could find in which the orientation of a germinating  
409 spore relative to its sibling spores is discernible, the direction of outgrowth, budding and/or  
410 mating is consistent with prepolarization away from the interspore bridges. In *S. pombe*  
411 spores, on the other hand, lack of prepolarization has been clearly demonstrated (Bonazzi  
412 et al., 2014), and an assumption that *S. cerevisiae* is the same is understandable, given the  
413 many similarities with regard to mechanisms of sporulation. Several key differences are  
414 worth noting, however. Fission yeast spores lack interspore bridges, and ascus wall  
415 breakdown is a programmed event taking place immediately following successful  
416 completion of meiosis (H. Guo & King, 2013). Hence *S. pombe* spores are designed for  
417 dispersal, consistent with a mostly haploid lifestyle in this species, whereas *Saccharomyces*  
418 species appear to have evolved to prioritize return to diploidy following meiosis. From this  
419 perspective, why not prepolarize a spore directly towards its meiotic siblings, at least two-  
420 thirds of which will be of compatible mating type? A somewhat trivial explanation may be  
421 that interspore bridges represent a physical barrier to outgrowth, analogous to the  
422 difficulties that non-spore yeast cells encounter when mutations drive them to re-bud  
423 through a chitin-rich bud scar (Tong et al., 2007). We propose another model. In a  
424 crowded four-spored ascus, navigating gradients of multiple pheromones in order to  
425 identify a compatible partner is non-trivial (Rappaport & Barkai, 2012). If germinating  
426 spores grew into the center of the ascus, the situation would become even more complex,  
427 especially if spores budded and then switched mating types. Hence, prepolarization away  
428 from the center may facilitate pheromone sensing by simplifying the gradients of signals  
429 spores must navigate to find a mate.

430 For other septin functions, e.g., cytokinesis, Cdc10 acts together with other septin proteins  
431 as a stable hetero-oligomeric protein complex that act as diffusion barriers and scaffolds for  
432 the recruitment and cortical retention of other proteins (Oh & Bi, 2011). Polymerization of  
433 hetero-oligomeric septin complexes into filaments is required for cytokinesis (McMurray et  
434 al., 2011); no single septin is sufficient. Hence while we have not yet asked if other septins  
435 co-localize with Cdc10 to cortical foci in spores, we speculate that they do. What specific  
436 function, if any, Cdc10 might perform at these foci is an intriguing question for future  
437 inquiry. In non-spore cells, septins encircle active Cdc42 at both the site of bud formation  
438 (Okada et al., 2013) and the shmoo (Kelley et al., 2015), but the cortical puncta in spores  
439 are not obviously ring-shaped, and it is not known if Cdc42 (and/or another Rho-family  
440 GTPase) is also there.

441 How does Cdc10 arrive at this location? Cdc10 and other septins localize around the  
442 spindle pole bodies at the end of meiosis metaphase II, where the prospore membrane first  
443 appears, and then localize as bars and horseshoes associated with the prospore membrane  
444 as it grows (Pablo-Hernando et al., 2008). The nuclear envelope and prospore membrane  
445 are connected via the spindle pole body until the meiosis-specific components of the  
446 "meiotic outer plaque", Mpc54 and Mpc70, are destroyed just after meiosis II (Knop &  
447 Strasser, 2000). The exocyst complex, which targets exocytic vesicle docking and fusion, is  
448 found (along with septins) at the meiotic outer plaque (Mathieson et al., 2010), at the  
449 shmoo tip (Kelley et al., 2015), and at the site of future budding by non-spore cells (W.  
450 Guo et al., 2001). Meiotic anaphase II pushes the spindle pole bodies toward the periphery  
451 of the ascus. If septins and/or the exocyst persist on the spore membrane at the former site  
452 of contact with the meiotic outer plaque, these "landmarks" will be near the periphery of  
453 the ascus, with the sites of prospore membrane fusion (and interspore bridges) in the  
454 center. Provided cortical diffusion of the landmarks is limited in mature spores, these sites



455 would correspond to the Cdc10 localization patterns and sites of outgrowth that we observe  
456 upon germination. Future work will be required to test this model.

457 Ascus wall penetration by buds has been documented previously (Hashimoto et al., 1958;  
458 Rij, 1978; Sando et al., 1980) but the implications for spore polarity were not considered.

459 The mechanism of local ascus digestion upon spore budding also remains unknown.

460 Budding itself requires cell wall digestion at a single site on an unbudded cell. Thus when a  
461 spore buds inside an ascus, two walls are locally digested: the wall of the spore and the

462 ascus wall. Another step in the yeast life cycle also requires local digestion of two walls: cell

463 fusion upon mating. Here it is thought that targeted secretion of enzymes followed by cell-

464 contact-limited diffusion restricts digestion to a narrow pore (Huberman & Murray, 2014).

465 We imagine that a similar mechanism, perhaps involving the same enzymes, mediates ascus

466 wall penetration during budding. Our results show that, despite localizing to the right place

467 at the right time, Gas1 is dispensable for this process; other enzymes may act redundantly.

468 Intra-ascus mating events do not locally digest the ascus wall because repolarization

469 towards the mating partner directs the digestive enzymes elsewhere. On the other hand,

470 during inter-ascus mating events *Saccharomyces* spores penetrate four walls in order to

471 fuse. Crowding promotes inter-ascus mating (Murphy & Zeyl, 2010), which emphasizes the

472 importance of considering where germination occurs in nature and thus how evolution

473 acted upon it. Here we know very little. Sporulation is most frequent at the colony

474 periphery (Purnapatre & Honigberg, 2002), but to what extent wild yeast grow in such

475 colonies is unknown.

476 Indeed, while studies of polarity determination and mating by isolated non-spore

477 *Saccharomyces* cells in the laboratory setting have provided numerous insights into basic

478 biology, considering what we now know about the *Saccharomyces* life cycle outside the lab

479 (Tsai et al., 2008), budding and mating by non-spore haploids may represent a kind of  
480 backup plan for circumstances in which a spore is physically separated from, or chooses to  
481 ignore (McClure et al., 2018), its meiotic siblings. Even the spore-based proposed rationale  
482 for axial budding by haploids – to place two cells of one mating type adjacent to two cells  
483 of opposite mating type following mating-type switching by an isolated spore (Gimeno &  
484 Fink, 1992) – can now be viewed in an additional light: axial budding would help ensure  
485 that if a spore is still within an intact ascus when it buds a second time, the second bud will  
486 also penetrate the ascus wall. Our work thus highlights outstanding questions and lays a  
487 foundation for future studies.

## 488 6. References

- 489 Bender, A., & Pringle, J. R. (1989). Multicopy suppression of the *cdc24* budding defect in  
490 yeast by *CDC42* and three newly identified genes including the ras-related gene  
491 *RSR1*. *Proceedings of the National Academy of Sciences of the United States of*  
492 *America*, *86*(24), 9976–9980. <https://doi.org/10.1073/pnas.86.24.9976>
- 493 Bonazzi, D., Julien, J.-D., Romao, M., Seddiki, R., Piel, M., Boudaoud, A., & Minc, N.  
494 (2014). Symmetry Breaking in Spore Germination Relies on an Interplay between  
495 Polar Cap Stability and Spore Wall Mechanics. *Developmental Cell*, *28*(5), 534–546.  
496 <https://doi.org/10.1016/j.devcel.2014.01.023>
- 497 Brar, G. A., Yassour, M., Friedman, N., Regev, A., Ingolia, N. T., & Weissman, J. S. (2012).  
498 High-resolution view of the yeast meiotic program revealed by ribosome profiling.  
499 *Science (New York, N.Y.)*, *335*(6068), 552–557.  
500 <https://doi.org/10.1126/science.1215110>

- 501 Briza, P., Ellinger, A., Winkler, G., & Breitenbach, M. (1990). Characterization of a DL-  
502 dityrosine-containing macromolecule from yeast ascospore walls. *The Journal of*  
503 *Biological Chemistry*, 265(25), 15118–15123.
- 504 Cabib, E., & Bowers, B. (1975). Timing and function of chitin synthesis in yeast. *Journal of*  
505 *Bacteriology*, 124(3), 1586–1593.
- 506 Chiou, J.-G., Balasubramanian, M. K., & Lew, D. J. (2017). Cell Polarity in Yeast. *Annual*  
507 *Review of Cell and Developmental Biology*, 33, 77–101.  
508 <https://doi.org/10.1146/annurev-cellbio-100616-060856>
- 509 Coluccio, A. E., Rodriguez, R. K., Kernan, M. J., & Neiman, A. M. (2008). The Yeast Spore  
510 Wall Enables Spores to Survive Passage through the Digestive Tract of *Drosophila*.  
511 *PLoS ONE*, 3(8), e2873. <https://doi.org/10.1371/journal.pone.0002873>
- 512 Coluccio, A., & Neiman, A. M. (2004). Interspore bridges: A new feature of the  
513 *Saccharomyces cerevisiae* spore wall. *Microbiology (Reading, England)*, 150(Pt 10),  
514 3189–3196. <https://doi.org/10.1099/mic.0.27253-0>
- 515 Croes, A. F., Dodemont, H. J., & Stumm, C. (1976). Induction of meiosis in *Saccharomyces*  
516 *cerevisiae* at different points in the mitotic cycle. *Planta*, 130(2), 131–136.  
517 <https://doi.org/10.1007/BF00384409>
- 518 Dekker, N., van Rijssel, J., Distel, B., & Hochstenbach, F. (2007). Role of the alpha-  
519 glucanase Agn2p in ascus-wall endolysis following sporulation in fission yeast. *Yeast*  
520 *(Chichester, England)*, 24(4), 279–288. <https://doi.org/10.1002/yea.1464>
- 521 Eastwood, M. D., Cheung, S. W. T., Lee, K. Y., Moffat, J., & Meneghini, M. D. (2012).  
522 Developmentally programmed nuclear destruction during yeast gametogenesis.  
523 *Developmental Cell*, 23(1), 35–44. <https://doi.org/10.1016/j.devcel.2012.05.005>

- 524 Eastwood, M. D., & Meneghini, M. D. (2015). Developmental Coordination of Gamete  
525 Differentiation with Programmed Cell Death in Sporulating Yeast. *Eukaryotic Cell*,  
526 *14*(9), 858–867. <https://doi.org/10.1128/EC.00068-15>
- 527 Encinar del Dedo, J., Dueñas, E., Arnáiz, Y., del Rey, F., & Vázquez de Aldana, C. R. (2009).  
528 {beta}-glucanase Eng2 is required for ascus wall endolysis after sporulation in the  
529 fission yeast *Schizosaccharomyces pombe*. *Eukaryotic Cell*, *8*(8), 1278–1286.  
530 <https://doi.org/10.1128/EC.00148-09>
- 531 Fukunishi, K., Miyakubi, K., Hatanaka, M., Otsuru, N., Hirata, A., Shimoda, C., &  
532 Nakamura, T. (2014). The fission yeast spore is coated by a proteinaceous surface  
533 layer comprising mainly Isp3. *Molecular Biology of the Cell*, *25*(10), 1549–1559.  
534 <https://doi.org/10.1091/mbc.e13-12-0731>
- 535 Geijer, C., Joseph-Strauss, D., Simchen, G., Barkai, N., & Hohmann, S. (2010).  
536 *Saccharomyces cerevisiae* Spore Germination. In E. Lubzens, J. Cerda, & M. Clark  
537 (Eds.), *Dormancy and Resistance in Harsh Environments* (pp. 29–41). Springer  
538 Berlin Heidelberg. [https://doi.org/10.1007/978-3-642-12422-8\\_3](https://doi.org/10.1007/978-3-642-12422-8_3)
- 539 Giaever, G., Chu, A. M., Ni, L., Connelly, C., Riles, L., Véronneau, S., Dow, S., Lucau-Danila,  
540 A., Anderson, K., André, B., Arkin, A. P., Astromoff, A., El-Bakkoury, M., Bangham,  
541 R., Benito, R., Brachat, S., Campanaro, S., Curtiss, M., Davis, K., ... Johnston, M.  
542 (2002). Functional profiling of the *Saccharomyces cerevisiae* genome. *Nature*,  
543 *418*(6896), 387–391. <https://doi.org/10.1038/nature00935>
- 544 Gimeno, C., & Fink, G. (1992). The logic of cell division in the life cycle of yeast. *Science*,  
545 *257*(5070), 626. <https://doi.org/10.1126/science.1496375>
- 546 Guo, H., & King, M. C. (2013). A quality control mechanism linking meiotic success to  
547 release of ascospores. *PloS One*, *8*(12), e82758.  
548 <https://doi.org/10.1371/journal.pone.0082758>

- 549 Guo, W., Tamanoi, F., & Novick, P. (2001). Spatial regulation of the exocyst complex by  
550 Rho1 GTPase. *Nature Cell Biology*, 3(4), 353–360.  
551 <https://doi.org/10.1038/35070029>
- 552 Hashimoto, T., Conti, S. F., & Naylor, H. B. (1958). Fine structure of microorganisms. III.  
553 Electron microscopy of resting and germinating ascospores of *Saccharomyces*  
554 *cerevisiae*. *Journal of Bacteriology*, 76(4), 406–416.
- 555 Howell, A. S., Savage, N. S., Johnson, S., Bose, I., Wagner, A. W., Zyla, T. R., Nijhout, H.,  
556 Reed, M., Goryachev, A., & Lew, D. J. (2009, November 13). *Singularity in*  
557 *Polarization: Rewiring Yeast Cells to Make Two Buds*. *Cell*; *Cell*.  
558 <https://doi.org/10.1016/j.cell.2009.10.024>
- 559 Huberman, L. B., & Murray, A. W. (2014). A model for cell wall dissolution in mating yeast  
560 cells: Polarized secretion and restricted diffusion of cell wall remodeling enzymes  
561 induces local dissolution. *PLoS One*, 9(10), e109780.  
562 <https://doi.org/10.1371/journal.pone.0109780>
- 563 Iwase, M., Luo, J., Nagaraj, S., Longtine, M., Kim, H. B., Haarer, B. K., Caruso, C., Tong, Z.,  
564 Pringle, J. R., & Bi, E. (2006). Role of a Cdc42p effector pathway in recruitment of  
565 the yeast septins to the presumptive bud site. *Molecular Biology of the Cell*, 17(3),  
566 1110–1125. <https://doi.org/10.1091/mbc.E05-08-0793>
- 567 Johnson, C. R., Weems, A. D., Brewer, J. M., Thorner, J., & McMurray, M. A. (2015).  
568 Cytosolic chaperones mediate quality control of higher-order septin assembly in  
569 budding yeast. *Molecular Biology of the Cell*. [https://doi.org/10.1091/mbc.E14-11-](https://doi.org/10.1091/mbc.E14-11-1531)  
570 1531
- 571 Joseph-Strauss, D., Zenvirth, D., Simchen, G., & Barkai, N. (2007). Spore germination in  
572 *Saccharomyces cerevisiae*: Global gene expression patterns and cell cycle landmarks.  
573 *Genome Biology*, 8(11), R241. <https://doi.org/10.1186/gb-2007-8-11-r241>

- 574 Kelley, J. B., Dixit, G., Sheetz, J. B., Venkatapurapu, S. P., Elston, T. C., & Dohlman, H. G.  
575 (2015). RGS proteins and septins cooperate to promote chemotropism by regulating  
576 polar cap mobility. *Current Biology: CB*, 25(3), 275–285.  
577 <https://doi.org/10.1016/j.cub.2014.11.047>
- 578 Kloimwieder, A., & Winston, F. (2011). A Screen for Germination Mutants in  
579 *Saccharomyces cerevisiae*. *G3: Genes, Genomes, Genetics*, 1(2), 143–149.  
580 <https://doi.org/10.1534/g3.111.000323>
- 581 Knop, M., & Strasser, K. (2000). Role of the spindle pole body of yeast in mediating  
582 assembly of the prospore membrane during meiosis. *The EMBO Journal*, 19(14),  
583 3657–3667. <https://doi.org/10.1093/emboj/19.14.3657>
- 584 Kono, K., Matsunaga, R., Hirata, A., Suzuki, G., Abe, M., & Ohya, Y. (2005). Involvement of  
585 actin and polarisome in morphological change during spore germination of  
586 *Saccharomyces cerevisiae*. *Yeast (Chichester, England)*, 22(2), 129–139.  
587 <https://doi.org/10.1002/yea.1205>
- 588 Mathieson, E. M., Suda, Y., Nickas, M., Snyderman, B., Davis, T. N., Muller, E. G. D., &  
589 Neiman, A. M. (2010). Vesicle docking to the spindle pole body is necessary to  
590 recruit the exocyst during membrane formation in *Saccharomyces cerevisiae*.  
591 *Molecular Biology of the Cell*, 21(21), 3693–3707.  
592 <https://doi.org/10.1091/mbc.E10-07-0563>
- 593 McClure, A. W., Jacobs, K. C., Zyla, T. R., & Lew, D. J. (2018). Mating in wild yeast:  
594 Delayed interest in sex after spore germination. *Molecular Biology of the Cell*,  
595 mbcE18080528. <https://doi.org/10.1091/mbc.E18-08-0528>
- 596 McMurray, M. A., Bertin, A., Garcia, G., 3rd, Lam, L., Nogales, E., & Thorner, J. (2011).  
597 Septin filament formation is essential in budding yeast. *Developmental Cell*, 20(4),  
598 540–549. <https://doi.org/10.1016/j.devcel.2011.02.004>

- 599 McMurray, M. A., & Thorner, J. (2008). Septin stability and recycling during dynamic  
600 structural transitions in cell division and development. *Current Biology: CB*, *18*(16),  
601 1203–1208. <https://doi.org/10.1016/j.cub.2008.07.020>
- 602 Murphy, H. A., & Zeyl, C. W. (2010). Yeast Sex: Surprisingly High Rates of Outcrossing  
603 between Asci. *PLoS ONE*, *5*(5), e10461.  
604 <https://doi.org/10.1371/journal.pone.0010461>
- 605 Neiman, A. M. (2011). Sporulation in the budding yeast *Saccharomyces cerevisiae*.  
606 *Genetics*, *189*(3), 737–765. <https://doi.org/10.1534/genetics.111.127126>
- 607 Oh, Y., & Bi, E. (2011). Septin structure and function in yeast and beyond. *Trends in Cell*  
608 *Biology*, *21*(3), 141–148. <https://doi.org/10.1016/j.tcb.2010.11.006>
- 609 Okada, S., Leda, M., Hanna, J., Savage, N. S., Bi, E., & Goryachev, A. B. (2013). Daughter  
610 cell identity emerges from the interplay of Cdc42, septins, and exocytosis.  
611 *Developmental Cell*, *26*(2), 148–161. <https://doi.org/10.1016/j.devcel.2013.06.015>
- 612 Pablo-Hernando, M. E., Arnaiz-Pita, Y., Tachikawa, H., del Rey, F., Neiman, A. M., &  
613 Vázquez de Aldana, C. R. (2008). Septins localize to microtubules during nutritional  
614 limitation in *Saccharomyces cerevisiae*. *BMC Cell Biology*, *9*, 55.  
615 <https://doi.org/10.1186/1471-2121-9-55>
- 616 Purnapatre, K., & Honigberg, S. M. (2002). Meiotic differentiation during colony  
617 maturation in *Saccharomyces cerevisiae*. *Current Genetics*, *42*(1), 1–8.  
618 <https://doi.org/10.1007/s00294-002-0331-x>
- 619 Rappaport, N., & Barkai, N. (2012). Disentangling signaling gradients generated by  
620 equivalent sources. *Journal of Biological Physics*, *38*(2), 267–278.  
621 <https://doi.org/10.1007/s10867-011-9240-x>

- 622 Rij, N. J. W. K.-V. (1978). Electron microscopy of germinating ascospores of *Saccharomyces*  
623 *cerevisiae*. *Archives of Microbiology*, *117*(1), 73–77.  
624 <https://doi.org/10.1007/BF00689354>
- 625 Roemer, T., Vallier, L., Sheu, Y. J., & Snyder, M. (1998). The Spa2-related protein, Sph1p,  
626 is important for polarized growth in yeast. *Journal of Cell Science*, *111 ( Pt 4)*, 479–  
627 494.
- 628 Rolli, E., Ragni, E., de Medina-Redondo, M., Arroyo, J., de Aldana, C. R. V., & Popolo, L.  
629 (2011). Expression, stability, and replacement of glucan-remodeling enzymes during  
630 developmental transitions in *Saccharomyces cerevisiae*. *Molecular Biology of the*  
631 *Cell*, *22*(9), 1585–1598. <https://doi.org/10.1091/mbc.E10-03-0268>
- 632 Sando, N., Oguchi, T., Nagano, M., & Osumi, M. (1980). MORPHOLOGICAL CHANGES IN  
633 ASCOSPORES OF SACCHAROMYCES CEREVISIAE DURING AEROBIC AND  
634 ANAEROBIC GERMINATION. *The Journal of General and Applied Microbiology*,  
635 *26*(6), 403–412. <https://doi.org/10.2323/jgam.26.403>
- 636 Sena, E., Radin, D., & Fogel, S. (1973, May). *Synchronous Mating in Yeast*. Proceedings of  
637 the National Academy of Sciences of the United States of America; Proc Natl Acad  
638 Sci U S A. <https://doi.org/10.1073/pnas.70.5.1373>
- 639 Tong, Z., Gao, X.-D., Howell, A. S., Bose, I., Lew, D. J., & Bi, E. (2007). Adjacent  
640 positioning of cellular structures enabled by a Cdc42 GTPase-activating protein-  
641 mediated zone of inhibition. *The Journal of Cell Biology*, *179*(7), 1375–1384.  
642 <https://doi.org/10.1083/jcb.200705160>
- 643 Tsai, I. J., Bensasson, D., Burt, A., & Koufopanou, V. (2008). Population genomics of the  
644 wild yeast *Saccharomyces paradoxus*: Quantifying the life cycle. *Proceedings of the*  
645 *National Academy of Sciences of the United States of America*, *105*(12), 4957–4962.  
646 <https://doi.org/10.1073/pnas.0707314105>



- 647 Vida, T., & Emr, S. D. (1995, March). *A New Vital Stain for Visualizing Vacuolar Membrane*  
648 *Dynamics and Endocytosis in Yeast*. The Journal of Cell Biology; J Cell Biol.  
649 <https://doi.org/10.1083/jcb.128.5.779>
- 650 Watanabe, M., Watanabe, D., Nogami, S., Morishita, S., & Ohya, Y. (2009). Comprehensive  
651 and quantitative analysis of yeast deletion mutants defective in apical and isotropic  
652 bud growth. *Current Genetics*, 55(4), 365–380. [https://doi.org/10.1007/s00294-](https://doi.org/10.1007/s00294-009-0251-0)  
653 [009-0251-0](https://doi.org/10.1007/s00294-009-0251-0)
- 654
